# Supplementary material for: Similar response profile to neoadjuvant chemotherapy, but different survival, in inflammatory versus locally advanced breast cancers
Source: PubMed Central journal article supplement (PMC5630389; doi:10.18632/oncotarget.19732), 2017-07-31
Supplement: oncotarget-08-66019-s001.pdf [file oncotarget-08-66019-s001.pdf]

## **Similar response profile to neoadjuvant chemotherapy, but different survival, in inflammatory *versus* locally advanced breast cancers**

### **SUPPLEMENTARY MATERIALS**

**Supplementary Table 1: Univariate analyses for pCR in IBC and in non-IBC**

**See Supplementary File 1**
